# Supplementary material for: A Nomogram Model for Early Predicting In-Hospital Mortality Risk in Patients with Large Hemispheric Cerebral Infarction
Source: Research Square preprint supplement (doi:10.21203/rs.3.rs-3446848/v1), 2023-10-18
Supplement: Supplementary file 1 [file 055c416139c4f169a2daecd4.xlsx]

## Sheet: Sheet1
Table 1. Demographic characteristics & clinical information of the study patients (n = 314)
Characteristics	All (n = 314)	Survival Group （n = 221)	Death Group (n = 93)	p-value
Age	75.67 ± 12.28	75.10 ± 12.12	77.02 ± 12.62	0.207
Glascow Coma Score	9.90 ± 3.56	10.82 ± 3.37	7.71 ± 3.04	<0.001
ASPECTS	5.32 ± 3.08	6.05 ± 2.75	3.56 ± 3.12	<0.001
NIHSS score	16.81 ± 6.56	14.93 ± 5.93	21.28 ± 5.79	<0.001
Collateral Score	1.49 ± 1.08	1.71 ± 1.00	0.95 ± 1.06	<0.001
WBC	28.93 ± 74.04	26.48 ± 73.38	34.75 ± 75.65	0.366
Neutrophil count	8.91 ± 3.67	8.18 ± 3.23	10.66 ± 4.06	<0.001
Lymphocyte count	1.77 ± 2.57	1.76 ± 2.22	1.82 ± 3.28	0.854
NLR	9.20 ± 9.00	7.44 ± 5.85	13.39 ± 12.98	<0.001
Fibrinogen level	3.94 ± 2.33	3.83 ± 1.32	4.22 ± 3.76	0.166
SBP	149.77 ± 23.30	150.06 ± 22.14	149.08 ± 25.96	0.732
DBP	83.03 ± 14.93	83.04 ± 14.39	83.01 ± 16.23	0.987
APACHE II	13.20 ± 5.50	11.83 ± 4.97	16.46 ± 5.33	<0.001
Midline Shift (mm)	3.41 ± 5.28	2.12 ± 3.54	6.49 ± 7.17	<0.001
Sex
Female	156 (49.68)	109 (49.32)	47 (50.54)	0.942
Male	158 (50.32)	112 (50.68)	46 (49.46)
TOAST Classification
Large-artery atherosclerosis	171 (54.46)	129 (58.37)	42 (45.16)	0.043
Cardioembolism	143 (45.54)	92 (41.63)	51 (54.84)
Consciousness disorders
No	110 (35.03)	96 (43.44)	14 (15.05)	<0.001
Yes	204 (64.97)	125 (56.56)	79 (84.95)
History of hypertension
No	72 (22.93)	44 (19.91)	28 (30.11)	0.069
Yes	242 (77.07)	177 (80.09)	65 (69.89)
History of diabetes mellitus
No	200 (63.69)	135 (61.09)	65 (69.89)	0.176
Yes	114 (36.31)	86 (38.91)	28 (30.11)
Atrial fibrillation
No	177 (56.37)	136 (61.54)	41 (44.09)	0.006
Yes	137 (43.63)	85 (38.46)	52 (55.91)
Ventilation
No	241 (76.75)	206 (93.21)	35 (37.63)	<0.001
Yes	73 (23.25)	15 ( 6.79)	58 (62.37)
History of stroke
No	226 (71.97)	157 (71.04)	69 (74.19)	0.667
Yes	88 (28.03)	64 (28.96)	24 (25.81)
Smoking history
No	256 (81.53)	177 (80.09)	79 (84.95)	0.394
Yes	58 (18.47)	44 (19.91)	14 (15.05)
Drink history
No	271 (86.31)	190 (85.97)	81 (87.10)	0.932
Yes	43 (13.69)	31 (14.03)	12 (12.90)
Pneumonia
No	97 (30.89)	69 (31.22)	28 (30.11)	0.951
Yes	217 (69.11)	152 (68.78)	65 (69.89)
UTI
No	283 (90.13)	196 (88.69)	87 (93.55)	0.267
Yes	31 ( 9.87)	25 (11.31)	6 ( 6.45)
Gastrointestinal bleeding
No	296 (94.27)	209 (94.57)	87 (93.55)	0.928
Yes	18 ( 5.73)	12 ( 5.43)	6 ( 6.45)
Hemorrhagic transformation
No	236 (75.16)	162 (73.30)	74 (79.57)	0.303
Yes	78 (24.84)	59 (26.70)	19 (20.43)
Seizure
No	303 (96.50)	213 (96.38)	90 (96.77)	1
Yes	11 ( 3.50)	8 ( 3.62)	3 ( 3.23)
Admission anisocoria
No	263 (83.76)	198 (89.59)	65 (69.89)	<0.001
Yes	51 (16.24)	23 (10.41)	28 (30.11)
Admission Gaze deviation
No	160 (50.96)	129 (58.37)	31 (33.33)	<0.001
Yes	154 (49.04)	92 (41.63)	62 (66.67)
Lesion side
Left	149 (47.45)	108 (48.87)	41 (44.09)	0.515
Right	165 (52.55)	113 (51.13)	52 (55.91)
Infarction Involving Non-MCA Perfusion Territories
No	196 (62.42)	152 (68.78)	44 (47.31)	0.001
Yes	118 (37.58)	69 (31.22)	49 (52.69)
Lateral Ventricular Compression
No	136 (43.31)	105 (47.51)	31 (33.33)	0.029
Yes	178 (56.69)	116 (52.49)	62 (66.67)
Basalcistern effacement
No	231 (73.57)	182 (82.35)	49 (52.69)	<0.001
Yes	83 (26.43)	39 (17.65)	44 (47.31)
