# Supplementary material for: A Nomogram Model for Early Predicting In-Hospital Mortality Risk in Patients with Large Hemispheric Cerebral Infarction
Source: Research Square preprint supplement (doi:10.21203/rs.3.rs-3446848/v1), 2023-10-18
Supplement: Supplementary file 2 [file 795e0ef297b196ce59a2b2dd.xlsx]

## Sheet: Sheet1
Table 2. Univariate and multivariate logistic regression of the eight predictors.
Variables	Univariate analysis			Multivariate analysis
	OR	95% CI	p-value	OR	95% CI	p-value	VIF
NIHSS	1.23	1.16–1.31	<0.001	1.13	1.04–1.22	0.003	1.44
Collateral Score	0.38	0.27–0.51	<0.001	0.63	0.41–0.95	0.031	1.35
NLR	1.08	1.04–1.13	<0.001	1.05	1.00–1.10	0.069	1.14
Ventilation							1.25
No	1.00 (ref)			1.00 (ref)
Yes	18.14	8.77–40.08	<0.001	9.45	3.99–23.99	<0.001
Infarction Involving Non-MCA Perfusion Territories							1.06
No	1.00 (ref)			1.00 (ref)
Yes	2.53	1.43–4.51	0.002	2.50	1.11–5.79	0.029
Midline Shift (mm)							1.25
No	1.00 (ref)			1.00 (ref)
Yes	1.20	1.13–1.29	<0.001	1.12	1.04–1.22	0.004
